# Supplementary material
Source: Springer Nature journal article supplement (https://www.springermedizin.de/resource/supplementary/12885_2012_3486_MOESM1_ESM.pdf/9463776)

Relative Quantity (log10)

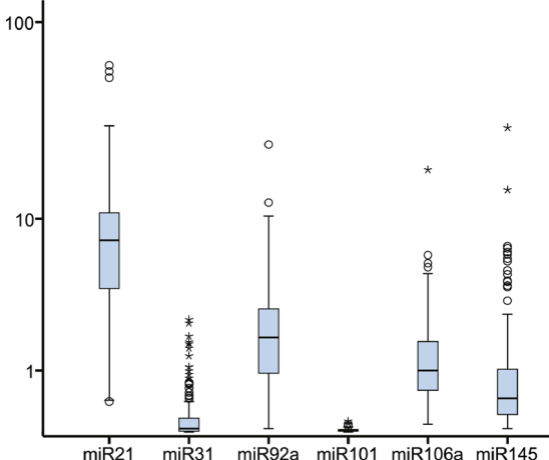

Supplement: MOESM1 [file 9463776]
